# Supplementary material for: Highly effective anti-corrosion epoxy spray coatings containing self-assembled clay in smectic order
Source: Royal Society of Chemistry journal article supplement (doi:10.1039/c4ta06221c), 2014-12-10
Supplement: c4ta06221c1.pdf [file c4ta06221c1.pdf]

## Supplemental Information

### Highly effective anti-corrosion epoxy spray coatings containing self-assembled clay in smectic order

Peng Li,<sup>a</sup> Xingliang He,<sup>b</sup> Tsao-Cheng Huang,<sup>a</sup> Kevin L. White,<sup>c</sup> Xi Zhang,<sup>d</sup> Hong Liang,<sup>b</sup> Riichi Nishimura,<sup>e</sup> and Hung-Jue Sue \*<sup>a,b</sup>

<sup>a</sup> Polymer Technology Center, Department of Materials Science and Engineering, Texas A&M University, College Station, TX 77843, United States

<sup>b</sup> Department of Mechanical Engineering, Texas A&M University, College Station, TX 77843, United States

<sup>c</sup> International Institute for Carbon-Neutral Energy Research (WPI-I<sup>2</sup>CNER), Kyushu University, Fukuoka 819-0395, Japan

<sup>d</sup> Kaneka Americas Holding Inc., Pasadena, Texas 77507, United States

<sup>e</sup> Corporate R&D Division, Kaneka Corporation, Osaka 530-8288, Japan

Corresponding author: E-mail: [hjsue@tamu.edu](mailto:hjsue@tamu.edu) (H.-J. Sue).

Supplemental Table S1. Summary of anti-corrosion properties of various polymer nanocomposites obtained from literature.

| Anticorrosion Coating            | Filler Loading | Testing solution   | Coating Thickness | I <sub>corr</sub> Decrease | E <sub>corr</sub> Increase | Citation         |
|----------------------------------|----------------|--------------------|-------------------|----------------------------|----------------------------|------------------|
| <b>This work</b>                 | <b>11 wt.%</b> | <b>7 wt.% NaCl</b> | <b>14 μm</b>      | <b>80%</b>                 | <b>950%</b>                | <b>This work</b> |
| Epoxy/MMT                        | 5 wt.%         | 5 wt.% NaCl        | 34 μm             | 94%                        | 17%                        | Ref. [S1]        |
| PANI/MMT                         | 1 wt.%         | 3.5 wt.% NaCl      | NA                | 15%                        | 3%                         | Ref. [S2]        |
| PMMA/MMT                         | 6.9 wt.%       | 5 wt.% NaCl        | 113 μm            | 95%                        | 83%                        | Ref. [S3]        |
| PANI/Graphene                    | 0.5 wt.%       | 3.5 wt.% NaCl      | 31 μm             | 63%                        | 10%                        | Ref.[S4]         |
| PANI/Clay                        | 0.5 wt.%       | 3.5 wt.% NaCl      | 29 μm             | 90%                        | 17%                        | Ref. [S4]        |
| Epoxy/SiO <sub>2</sub>           | 3 wt.%         | 5 wt.% NaCl        | 23 μm             | 95%                        | 34%                        | Ref. [S5]        |
| PS/GO                            | 1.5 wt.%       | 3.5 wt.% NaCl      | 27 μm             | 99%                        | 48%                        | Ref. [S6]        |
| Epoxy/Graphene                   | 1 wt.%         | 3.5 wt.% NaCl      | 115 μm            | 90%                        | 39%                        | Ref. [S7]        |
| Epoxy/Clay                       | 5 wt.%         | 3.5 wt.% NaCl      | 30 μm             | 33%                        | 16%                        | Ref. [S8]        |
| PI/Clay                          | 3 wt.%         | 3.5 wt.% NaCl      | 25 μm             | 56%                        | 34%                        | Ref. [S9]        |
| PI/SiO <sub>2</sub>              | 5 wt.%         | 3.5 wt.% NaCl      | NA                | 70%                        | 25%                        | Ref. [S10]       |
| Epoxy/SiO <sub>2</sub>           | 1.4 wt.%       | 3.5 wt.% NaCl      | 50 μm             | 99%                        | 10%                        | Ref. [S11]       |
| Polybenzoxazine/SiO <sub>2</sub> | 5 wt.%         | 3.5 wt.% NaCl      | 5 μm              | NA                         | 31%                        | Ref. [S12]       |

Note: The values of I<sub>corr</sub> decrease and E<sub>corr</sub> increase are defined as follows: I<sub>corr</sub> decrease = (I<sub>corr neat polymer</sub> - I<sub>corr nanocomposite</sub>)/I<sub>corr neat polymer</sub>, E<sub>corr</sub> increase = |(E<sub>corr nanocomposite</sub> - E<sub>corr neat polymer</sub>)/E<sub>corr neat polymer</sub>|.

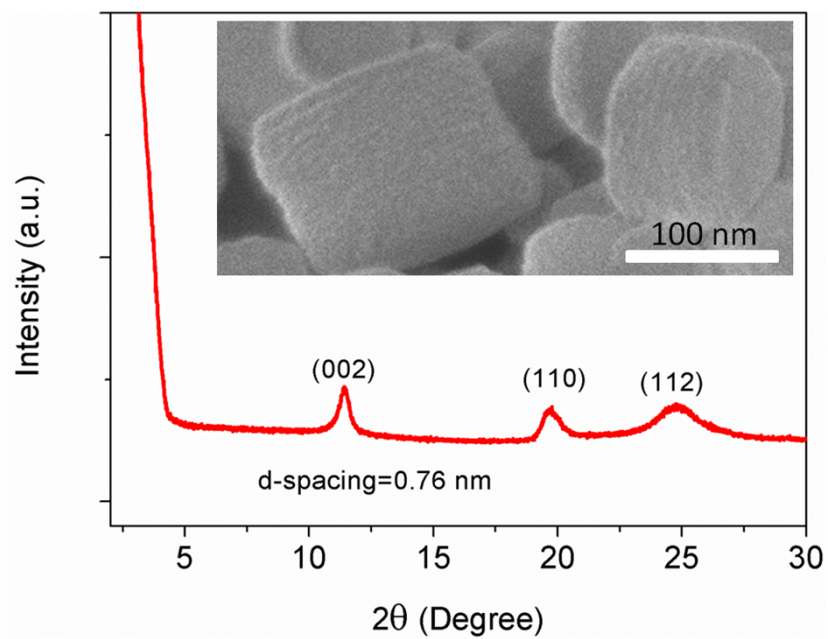

Supplemental Fig. S1 XRD of pristine ZrP nanoplatelets. Inset is the SEM image of pristine ZrP stacks.

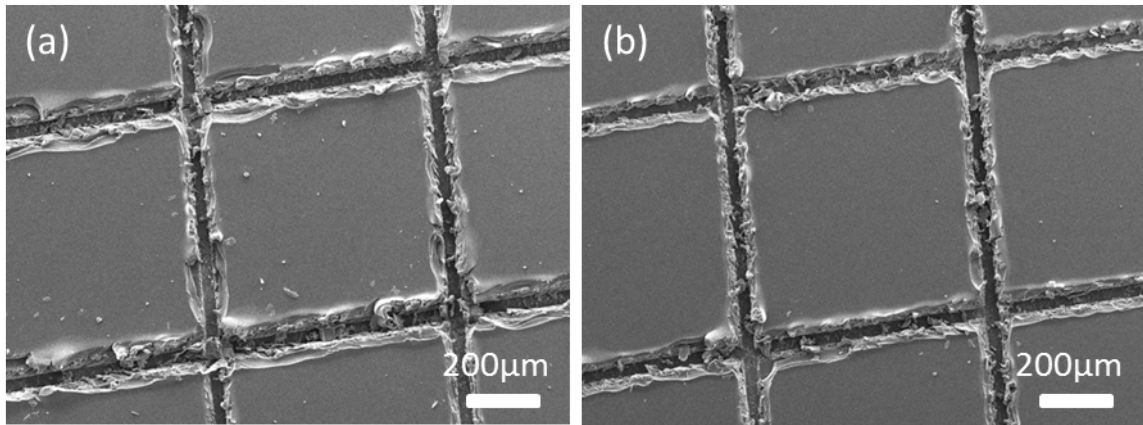

Supplemental Fig. S2 SEM images of (a) neat epoxy coating and (b) smectic epoxy/ZrP coating on the aluminium substrates after testing for evaluating adhesion according to ASTM standard D 3359-02.

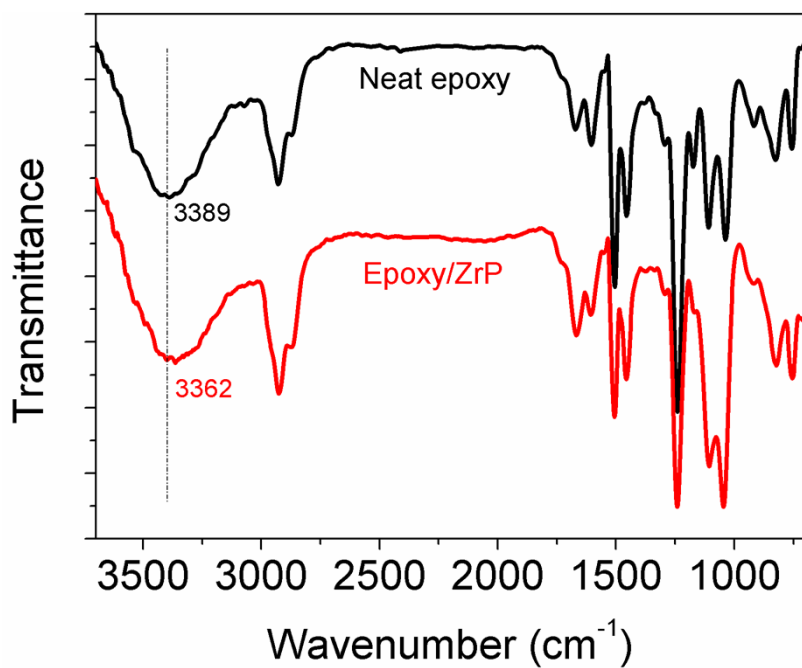

Supplemental Fig. S3 Fourier-Transform Infrared spectra (FTIR) of neat epoxy and smectic epoxy/ZrP nanocomposites.

### Supplemental Reference:

- [S1] J. M. Yeha, H. Y. Huanga, C. L. Chena, W. F. Sua, Y. H. Yub, *Surface & Coatings Technology*, 2006, **200**, 2753-2763.
- [S2] M. Nooshabadi, S. M. Ghoreishi, M. Behpour, *Corrosion Science*, 2011, **53**, 3035-3042.
- [S3] J. Yeh, S. Liou, C. Lin, C. Cheng, Y. Chang, *Chem. Mater.*, 2002, **14**, 154-161.
- [S4] C. Chang, T. C. Huang, C. W. Peng, T. Yeh, H. Lu, J. M. Yeh, *Carbon*, 2012, **14**, 5044-5051.
- [S5] T. C. Huang, Y. A. Sua, T. C. Yeha, C. P. Wua, K. Huang, Y. C. Chou, J. Yeh, Y. Wei, *Electrochimica Acta*, 2011, **56**, 6142-6149.
- [S6] Y. Yu, Y. Lin, C. Lin, C. Chan, Y. Huang, *Polym. Chem.*, 2014, **5**, 535-550.
- [S7] K. Chang, M. Hsu, H. Lu, M. Lai, J. Yeh, W. Liu, *Carbon*, 2014, **66**, 144-153.
- [S8] C. H. Chang, M. H. Hsu, C. Weng, W. Hung, T. Chuang, K. Chang, C. Peng, Y. Yen, J. Yeh, *J. Mater. Chem.*, 2013, **1**, 13869-13877.
- [S9] H. Huang, T. Huang, T. Yeh, C. Y. Tsai, C. Lai, M. Tsai, J. Yeh, Y. C. Chou, *Polymer*, 2011, **52**, 2391-2400.
- [S10] Y. C. Chou, P. C. Lee, T. F. Hsu, W. Y. Huang, L. Z. Han, C. Y. Chuang, T. I. Yang, J. M. Yeh, *Polymer Composite*, 2013, DOI: 10.1002/pc.22703.
- [S11] M. A. Hegazy, M. M. Hefny, A. M. Badawi, M. Y. Ahmed, *Progress in Organic Coatings*, 2013, **76**, 827-834.
- [S12] C. Zhou, X. Lu, Z. Xin, J. Liu, Y. Zhang, *Corrosion Science*, 2013, **70**, 145-151.
